# Supplementary figures and images for: Signs and Symptoms of Acute Bowel Inflammation and the Risk of Progression to Inflammatory Bowel Disease: A Retrospective Analysis
Source: MDPI journal article supplement (doi:10.3390/jcm11154595), 2022-08-06

Time to IBD

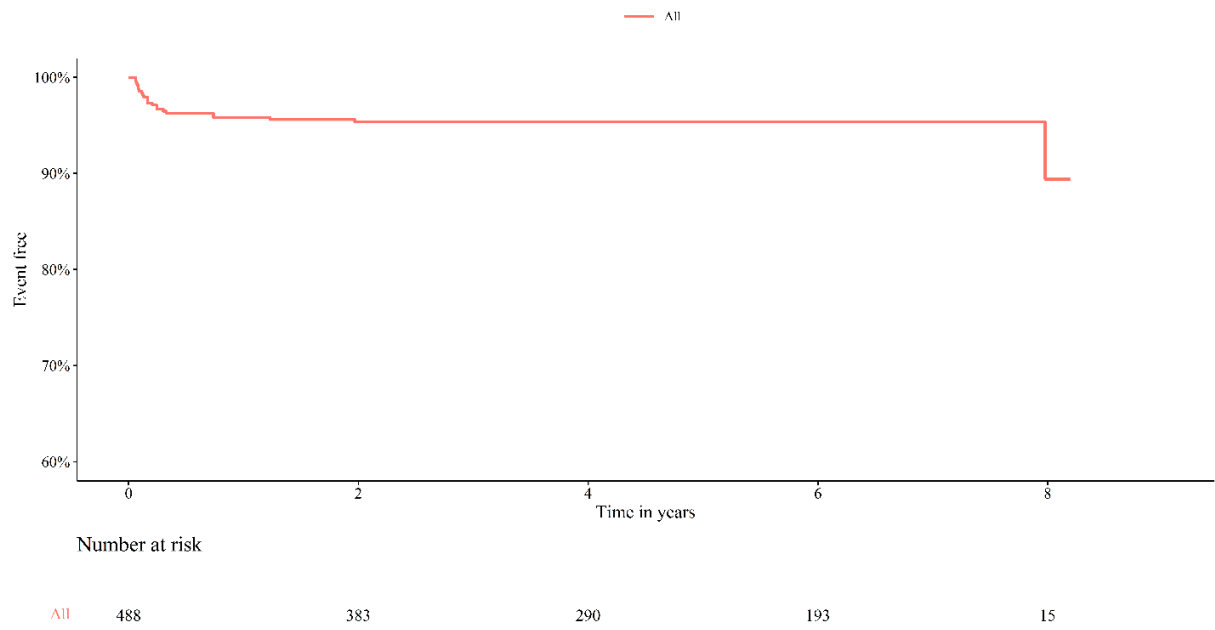

Supplement: s1 [file s1]
